1 **Title:** Transcriptomes of Electrophysiologically Recorded Dbx1-derived Inspiratory Neurons of  
2 the preBötzing Complex in Neonatal Mice

3 **Authors:**

4 Prajka S. Kallurkar<sup>1</sup>, ORCID: 0000-0003-2911-6595

5 Maria Cristina D. Picardo<sup>1</sup>, ORCID: 0000-0001-8912-2175

6 Yae K. Sugimura<sup>2</sup>, ORCID: 0000-0001-8840-797X

7 Margaret S. Saha<sup>3</sup>, ORCID: 0000-0003-0096-2667

8 Gregory D. Conradi Smith<sup>1</sup>, ORCID: 0000-0002-1054-6790

9 Christopher A. Del Negro<sup>1</sup>, ORCID: 0000-0002-7848-8224

10 **Author affiliations:**

11 1 Department of Applied Science, William & Mary, Williamsburg, Virginia, USA

12 2 Department of Neuroscience, Jikei University School of Medicine, Tokyo, Japan

13 3 Department of Biology, William & Mary, Williamsburg, Virginia, USA

14 **Corresponding author:** Christopher A. Del Negro, Ph.D., [cadeln@wm.edu](mailto:cadeln@wm.edu), 757-221-7808

15 **Disclaimers:** The views expressed in the submitted article are those of the authors and not the  
16 official position of William & Mary.

17 **Author Contributions:** PK, MCP, and YS contributed equally to the project. PK, MCP and YS  
18 performed the experiments. PK, CDN, MCP, MSS, and GDS analyzed the data. PK and CDN wrote  
19 the paper. All authors edited and approved the final version.

20 **Acknowledgements:** funded by NIH R01 NS107296 (PI: Del Negro), NIH R01 AT01816 (PI:  
21 Conradi Smith and Del Negro, NSF DMS 1951646 (PI: Conradi Smith), NSF DEB 2031275 (PI:  
22 Conradi Smith), NIH R15 HD096415 (PI: Saha)

23 **Number of figures and tables:** 5 figures with 4 figure supplements; 3 table supplements

24 **Number of words in Abstract:** 151

25 **Number of words in Introduction:** 472

26 **Conflict of interest:** The authors declare no conflicting financial interests.

## 27 Abstract

28 Breathing depends on interneurons in the preBötzinger complex (preBötC) derived from *Dbx1*-  
29 expressing precursors. Here we investigate whether rhythm- and pattern-generating functions  
30 reside in discrete classes of *Dbx1* preBötC neurons. In a slice model of breathing with ~5 s cycle  
31 period, putatively rhythmogenic Type-1 *Dbx1* preBötC neurons activate 100-300 ms prior to  
32 Type-2 neurons, putatively specialized for output pattern, and 300-500 ms prior to the  
33 inspiratory motor output. We sequenced Type-1 and Type-2 transcriptomes and identified  
34 differential expression of 123 genes including ionotropic receptors (*Gria3* and *Gabra1*) that may  
35 explain their preinspiratory activation profiles and  $Ca^{2+}$  signaling (*Cracr2a*, *Sgk1*) involved in  
36 inspiratory and sigh bursts. Surprisingly, neuropeptide receptors that influence breathing (e.g.,  
37  $\mu$ -opioid and bombesin-like peptide receptors) were only sparsely expressed, which suggests  
38 that cognate peptides and opioid drugs exert their profound effects on a small fraction of the  
39 preBötC core. These data in the public domain help explain breathing's neural origins.

## 40 Introduction

41 Inspiration, the preeminent active phase of breathing, originates in the preBötzinger complex  
42 (preBötC) of the lower brainstem<sup>1,2</sup>. Interneurons derived from *Dbx1*-expressing precursors  
43 (hereafter, *Dbx1* neurons)<sup>3,4</sup> comprise the preBötC core; they are responsible for generating  
44 inspiratory rhythm and transmitting it as a rudimentary output pattern to premotoneurons and  
45 motoneurons for pump and airway muscles<sup>5-9</sup>.

46 Cellular-level studies of inspiratory rhythm and pattern take advantage of transverse slices that  
47 retain the preBötC and remain spontaneously rhythmic *in vitro*. Constituent preBötC neurons  
48 can be recorded at the rostral slice surface while monitoring the inspiratory motor rhythm (~5 s  
49 cycle period) via the hypoglossal (XII) cranial nerve. Inspiration begins with a low amplitude  
50 preinspiratory phase attributable solely to rhythmogenic neurons. As their activity crosses  
51 threshold, preinspiration leads to an inexorable high amplitude inspiratory burst, which recruits  
52 an additional class of pattern-related neurons that drive motor output<sup>2,10-12</sup>. There are two  
53 theories that differentiate the *rhythm* and *pattern* subsets of the *Dbx1* preBötC neuron  
54 population.

55 The first theory posits that the neuropeptide somatostatin (SST) is a marker for output/pattern  
56 neurons. SST-expressing (SST<sup>+</sup>) preBötC neurons discharge during inspiration and  
57 postinspiration, i.e., the output phases of the inspiratory breathing cycle, rather than during the  
58 rhythmogenic preinspiratory phase. Furthermore, photostimulation in the preBötC of adult  
59 mice that express channelrhodopsin (ChR2) in SST<sup>+</sup> neurons preferentially affects inspiratory  
60 motor pattern<sup>6</sup>. These findings, in the context of what we already know about *Dbx1* neurons,  
61 suggest that the *Dbx1* SST<sup>+</sup> preBötC neurons play a dominant role in inspiratory pattern-  
62 generation and, by exclusion, that *Dbx1* preBötC neurons lacking SST expression (SST<sup>-</sup>) are  
63 inspiratory rhythmogenic<sup>6</sup>.

64 The second theory subdivides *Dbx1* preBötC neurons electrophysiologically. Neurons that  
65 activate with a ramp-like summation of synaptic potentials 300-500 ms before the onset of a  
66 large-magnitude inspiratory burst<sup>13,14</sup> are considered "Type-1" and putatively rhythmogenic.  
67 Type-1 neurons also express A-type transient K<sup>+</sup> current ( $I_A$ ) whose blockade perturbs

68 preinspiratory activity and destabilizes the inspiratory rhythm *in vitro*<sup>15</sup>. Neurons that activate  
69 ~300 ms later than Type-1<sup>13,14</sup> are considered “Type-2”, putatively downstream from Type-1  
70 and tasked with generating preBötC output<sup>10,14</sup>. Type-2 neurons express hyperpolarization-  
71 activated cationic current ( $I_h$ )<sup>13</sup> whose blockade profoundly affects motor output with mild  
72 effects on rhythm<sup>16</sup>.

73 We subdivided *rhythm* and *pattern* Dbx1 preBötC neurons based on the latter theory, which  
74 provides multiple criteria that can be measured during whole-cell recordings. We retrieved  
75 cytoplasmic contents and performed next-generation RNA sequencing on 17 samples: 7 Type-1,  
76 9 Type-2, and 1 neuron, referred to here as Unknown, that did not precisely fit either category  
77 but was Dbx1-derived and inspiratory. These data elucidate the transcriptional profile at the  
78 cellular point of origin for breathing, a key physiological behavior for humans and all mammals.  
79 The data are publicly available (National Center for Biotechnology Information [NCBI] Gene  
80 Expression Omnibus [GEO] Accession code: [GSE175642](https://www.ncbi.nlm.nih.gov/geo/query/acc.cgi?acc=GSE175642)) to facilitate future studies of the Dbx1  
81 preBötC core that interrogate the neural mechanisms of breathing.

## 82 Results and Discussion

83 We analyzed Dbx1 preBötC neurons using Patch-Seq<sup>17</sup>, which entails whole-cell patch-clamp  
84 recording followed by next-generation sequencing (Supplementary Fig. 1A) and bioinformatics  
85 (Supplementary Fig. 1B).

86 The maximum yield of high-quality RNA was inversely proportional to whole-cell recording  
87 duration (5 min on average, 3-8 min in all experiments). Inspiratory burst characteristics and  
88 intrinsic membrane properties for Type-1 and Type-2 neurons (Fig. 1A top and bottom,  
89 respectively) are already well established<sup>13,14</sup>. Given the time constraints, we focused on  
90 measuring the intrinsic membrane properties i.e., delayed excitation and sag potentials, at the  
91 expense of recording fewer inspiratory burst cycles.

92 Our patch-clamp recordings confirmed the previously published disparities between Type-1 and  
93 Type2 neurons. Type-1 neurons showed delayed excitation of  $167 \pm 40$  ms ( $n = 7$ ) when  
94 subjected to suprathreshold current steps from a baseline membrane potential below -70 mV  
95 (i.e., evidence of  $I_A$ ; Fig. 1B, top trace) but negligible sag potentials ( $2 \pm 1$  mV,  $n = 7$ ) when  
96 subjected to hyperpolarizing current steps from a baseline membrane potential of -50 mV (i.e.,  
97 no evidence of  $I_h$ ; Fig. 1C, top trace).

98 Type-2 neurons exhibited minimal delays in excitation ( $76 \pm 40$  ms,  $n = 9$ ) when subjected to  
99 suprathreshold current steps from a baseline membrane potential below -70 mV (i.e., no  
100 evidence of  $I_A$ ; Fig. 1B, bottom trace) but their membrane potential trajectory ‘sagged’  $11 \pm 4$   
101 mV ( $n = 9$ ) in the direction of baseline when subjected to hyperpolarizing current steps from a  
102 baseline membrane potential of -50 mV (i.e., evidence of  $I_h$ ; Fig. 1C, bottom trace).

103 The disparities between delayed excitation and sag potentials measured in Type-1 and Type-2  
104 neurons are unlikely to occur by random sampling from a single population with normally  
105 distributed expression of  $I_A$  and  $I_h$  with probabilities of  $p_{\text{delay}} = 0.0006$  ( $t = 4.53$ ,  $df = 13$ ) and  $p_{\text{sag}}$   
106  $= 0.0002$  ( $t = 4.96$ ,  $df = 14$ ), respectively. Therefore, we reject the null hypothesis and reconfirm  
107 that Type-1 and Type-2 are unique subpopulations of Dbx1 preBötC neurons<sup>13</sup>.

108 One Dbx1 preBötC inspiratory neuron we recorded and sequenced did not fit the criteria for  
109 Type-1 or Type-2, so we analyzed it as an Unknown.

110 We mapped all 17 samples to the murine genome (mm10 from [Ensembl](#)); 83% ± 3% of the  
111 sequences aligned uniquely resulting in an average of 10,335,384 uniquely aligned reads  
112 (Supplementary Table 1).

### 113 **Transcriptomic differences between Type-1 and Type-2 neurons**

114 The 31,543 genes that were expressed in at least one sample (7 Type-1 neurons and 9 Type-2  
115 neurons) were examined for differential expression by DESeq2 (Fig. 2A). The Unknown neuron  
116 was not included in this analysis. DESeq2 identified 123 differentially expressed (DE) genes  
117 (Figs. 2A<sub>a</sub>, 3, Supplementary Table 2;  $p_{\text{adj}} < 0.01$ ,  $\log_2$  fold change [L2FC] > 1.5). The DESeq2  
118 results were computed on Type-2 versus Type-1 neurons; a positive L2FC implies gene  
119 upregulation in Type-2 neurons, whereas a negative L2FC indicates gene upregulation in Type-1  
120 neurons.

121 We used principal component analysis (PCA) to assemble Dbx1 preBötC neurons in a plane  
122 based on transcriptome similarity, which revealed that Type-1 and Type-2 neurons form two  
123 distinct clusters (Fig. 2B). When we scrambled their Type-1 or Type-2 identities, PCA failed to  
124 differentiate the samples as two discrete classes (Supplementary Fig. 2), which suggests that  
125 Type-1 and Type-2 neurons are separate neuron classes based on their transcriptome (Fig. 2B  
126 and Supplementary Fig. 2) in addition to their unique neurophysiological properties (Fig. 1).

127 Genes upregulated in Type-1. We report an upregulation of the 5-HT<sub>1D</sub> receptor gene, *Htr1d*  
128 (Fig. 3, Supplementary Fig. 3, Supplementary Table 2).  $I_A$ , a characteristic Type-1 feature, is  
129 subject to neuromodulation by serotonin (5-HT) receptors, in mouse trigeminal ganglion  
130 neurons<sup>18</sup> and CA1 pyramidal neurons<sup>19,20</sup>. Interestingly, in rhythmic slices from neonatal rats,  
131 bath application of 5-HT increases the frequency, but not the amplitude, of XII motor output,  
132 implying a selective effect on the rhythm-generating population<sup>21-23</sup>, which probably maps to  
133 Type-1 neurons.

134 Genes upregulated in Type-2. Depletion of Ca<sup>2+</sup> in the endoplasmic reticulum (ER) activates the  
135 stromal interaction molecule (STIM) proteins, which subsequently activate the Ca<sup>2+</sup> release-  
136 activated Ca<sup>2+</sup> (CRAC) channels on the plasma membrane via the key subunit of CRAC channel,  
137 Orai1<sup>24-27</sup>. We report Type-2 upregulation of the CRAC channel regulator 2A gene, *Cracr2a*, as  
138 well as the serine/threonine protein kinase gene, *Sgk1*, which activates STIM1 and Orai1 and  
139 thus enhances store-operated Ca<sup>2+</sup> entry (SOCE)<sup>28</sup>. SOCE-related mechanisms that could  
140 support or augment inspiratory (eupnea-related) and sigh-related pattern generation remain  
141 important topics for investigation. For example, regarding inspiration, intracellular Ca<sup>2+</sup>  
142 signaling in the context of SOCE could recruit Ca<sup>2+</sup>-activated non-specific cationic current ( $I_{\text{CAN}}$ ),  
143 which profoundly contributes to inspiratory burst pattern<sup>29-31</sup>, consistent with the role of Type-  
144 2 neurons. Sigh breaths, which occur at lower frequencies but are two-fold larger in  
145 magnitude<sup>32</sup> are likely also to involve Ca<sup>2+</sup> signaling and possibly SOCE mechanisms that recruit  
146  $I_{\text{CAN}}$ <sup>33</sup>.

147 Dbx1 preBötC neurons are glutamatergic<sup>3,4</sup> and excitatory synaptic interactions, predominantly  
148 mediated by postsynaptic AMPA receptors, are essential for inspiratory rhythm and pattern  
149 generation<sup>34,35</sup>. We detect Type-2 upregulation of the AMPA receptor, *Gria3* (Figs. 3, 4,  
150 Supplementary Table 2), which may at first seem counterintuitive for the neuron class with  
151 shorter inspiratory drive latency and typically lower-amplitude inspiratory bursts<sup>10,13,14</sup>. Because  
152 the longer inspiratory drive latency in Type-1 neurons may be attributable to the rich topology  
153 of their excitatory synaptic interconnections<sup>36,37</sup>, we surmise that upregulation of *Gria3* in Type-  
154 2 neurons augments inspiratory drive in these less richly interconnected preBötC neurons.  
155 Upregulation of *Gria3* may amplify postsynaptic AMPA receptor-mediated inspiratory drive to  
156 accomplish the Type-2 role as output neurons.

157 Synaptic inhibition influences inspiratory rhythm and output pattern<sup>5,38-41</sup>. We report  
158 upregulation of the GABA<sub>A</sub> receptor, *Gabra1*, in Type-2 neurons (Figs. 3, 4, Supplementary Table  
159 2). GABAergic drive regulates Type-1 neurons, but *Gabra1* upregulation in Type-2 neurons  
160 suggests that inhibitory inputs may be equipped to bypass the oscillator and selectively act on  
161 the pattern-generating subpopulation to arrest inspiration with immediacy. Behavioral  
162 exigencies that might apply include the breath-hold dive reflex upon submersion or attentive  
163 immobility, that is, the arrest of all movement (including breathing) for predators stalking prey  
164 or prey attempting to camouflage themselves in the context of being hunted.

165 Transcription factors program cell fate during embryonic development and regulate gene  
166 expression postnatally. Because this study was performed postnatally (P0-2) it cannot detect  
167 the transcription factors acting in precursor cells. Nevertheless, we report upregulation of  
168 transcription factors *Akna* and *Runx1* in Type-2 neurons (Fig. 3, Supplementary Table 2). *Runx1*  
169 helps consolidate spinal motor neuron identity by suppressing interneuron programs<sup>42</sup>. It may,  
170 therefore, seem counterintuitive that *Runx1* is upregulated in Type-2, but we speculate that it  
171 may be acting to suppress Type-1 programs or else halting any further programming or  
172 developmental changes to Type-2 neurons. The potential role of *Akna* is not known.

173 Non-coding RNA. We report 15 differentially expressed long non-coding RNA (such as  
174 *2610035D17Rik*, *Gm39244*, *Gm32647*) (Fig. 3, Supplementary Table 2). The function of these  
175 transcripts and their role(s) in inspiratory rhythm- and pattern-generation is unexplored for  
176 now.

## 177 **Transcripts associated with cellular neurophysiology**

178 We next examined a broad spectrum of ionotropic and metabotropic synaptic receptors,  
179 peptides, peptide receptors, and transient receptor potential (Trp) ion channels (Fig. 4);  
180 voltage-dependent ion channels, regulatory subunits, and intracellular receptors (Fig. 5); purine  
181 receptors, monoamine receptors, and cell adhesion molecules (Supplementary Fig. 3); as well  
182 as transcription factors (Supplementary Fig. 4) irrespective of whether they are DE or non-DE  
183 genes. Here, our goal was to understand preBötC neuron excitability and signaling in general,  
184 not differential expression, so the criteria for inclusion were relaxed: any genes that were  
185 expressed in >25% of the neurons (4 out of 17), regardless of the type of neuron, were  
186 quantified (Supplementary Table 3) and cataloged.

187 *Ion channels and their regulation*. The delayed excitation in Type-1 neurons is a functional  
188 characteristic of A-type transient K<sup>+</sup> current that can be mediated by the K<sub>v</sub> channels: K<sub>v</sub>1.4  
189 (*Kcna4*), K<sub>v</sub>3.3-3.4 (*Kcnc3-4*), and K<sub>v</sub>4.1-4.3 (*Kcnd1-3*). However, the magnitude of I<sub>A</sub> depends on  
190 two proteases (*Dpp6*, *Dpp10*; Supplementary Table 3) that increase the plasma membrane  
191 expression of K<sub>v</sub>4.2<sup>43,44</sup> and the interacting proteins for all K<sub>v</sub>4.x channels (K channel-interacting  
192 proteins i.e. KChIPs [*Kcnip1-4*]; Fig. 5, Supplementary Table 3) that substantially enhance I<sub>A</sub>  
193 without affecting its voltage-dependence or kinetics<sup>45,46</sup>. Neither the genes for K<sub>v</sub> ion channels  
194 nor these regulatory genes cross our significance threshold in DESeq2 so we make no statistical  
195 claims; nevertheless, we posit that *Kcnip2* and *Kcnip4* are important for I<sub>A</sub> in Type-1 but our  
196 methods and analyses were insufficient to detect them.

197 The sag potential in Type-2 neurons is a classic property of hyperpolarization-activated, cyclic  
198 nucleotide-gate channels (HCN) channels encoded by *Hcn1-4* (Fig. 5, Supplementary Table 3).  
199 We do not detect any significant difference in the expression of these genes.

200 Our data show that Type-1 and Type-2 neurons comprise electrophysiologically discrete classes  
201 (Fig. 1) and yet they do not express different levels of ion channels typically associated with I<sub>A</sub>  
202 and I<sub>h</sub> (Fig. 5). We propose that the magnitude of I<sub>A</sub> and I<sub>h</sub>, and thus their influence on  
203 membrane potential trajectories, are instead governed by neuromodulation, upstream  
204 influences that would be difficult to assess by Patch-Seq, the potential role of *Htr1d*  
205 notwithstanding (see above).

206 *Peptides and peptide receptors*. Given the importance of the μ-opioid receptor, *Oprm1*, in  
207 opioid-induced respiratory depression we analyzed the expression of *Oprm1*, even though it  
208 was neither DE nor expressed in >25% of the samples. *Oprm1* is expressed in only 3 out 17  
209 samples here (2 Type-1 neurons and 1 Type-2 neuron express *Oprm1*, net mean expression of  
210  $0.50 \pm 1.58 \log_2[\text{FPKM}]$ , n = 17; Fig. 4, Supplementary Table 3). Our results are congruent with  
211 the recent demonstration that ~8% of Dbx1 preBötC neurons express *Oprm1*<sup>47</sup>. The apparent  
212 sparsity of *Oprm1* expression does not negate the obvious potency of μ-opioid receptor-  
213 mediated effects in the preBötC but it constrains the mechanism underlying opioid-induced  
214 respiratory depression to operate on a small fraction of constituent preBötC neurons, both  
215 Type-1 and Type-2, which affect rhythm and pattern.

216 Peptide receptors for tachykinins (neurokinin-1 receptor specifically), neuromedin B, and  
217 gastrin-releasing peptide (NK1R, *Nmbr*, and *Grpr*, respectively) modulate breathing by acting  
218 directly on preBötC neurons. NK1R-expressing (*Tacr1-3*) preBötC neurons form a  
219 heterogeneous population of rhythm- and pattern-generators<sup>48</sup>. Consistent with this idea, we  
220 do not observe differential expression of genes encoding NK1R (Fig. 4, only *Tacr3* passed our  
221 screening criteria for display).

222 Sigh breaths draw on the inspiratory reserve volume of the lungs to reinflate collapsed (or  
223 collapsing) alveoli and optimize pulmonary function<sup>32</sup>. Bombesin-like peptide receptors, *Nmbr*  
224 and *Grpr*, that modulate sighing were detected in ~7% of all preBötC neurons, including Dbx1  
225 and non-Dbx1 subpopulations<sup>49</sup>. We report more than double that expression level, i.e., ~18%  
226 of our samples (n = 3) expressed bombesin-like peptide receptor transcripts: 1 Type-1 and 1  
227 Type-2 neuron expressed *Nmbr* for a combined mean expression level of  $0.05 \pm 0.19 \log_2(\text{FPKM})$   
228 and 1 Type-2 neuron expressed *Grpr* at an expression level of  $0.01 \log_2(\text{FPKM})$ . These data are

229 in line with expectations because our study focuses exclusively on Dbx1 preBötC neurons, the  
230 core for inspiratory breathing rhythm and pattern, whereas Li *et al.* measured transcripts in any  
231 preBötC neuron, ~50% of which are not derived from Dbx1-expressing progenitors.

232 Pituitary adenylate cyclase-activating peptide (PACAP) is important for breathing responses to  
233 CO<sub>2</sub>. PACAP mutant mice exhibit blunted chemosensitivity and die within 3-weeks after birth  
234 due to respiratory defects<sup>50</sup>. Bilateral microinjections of PACAP in preBötC, *in vivo*, increases  
235 breathing frequency and inspiratory motor output<sup>50</sup> and *in vitro* leads to an increase in XII  
236 motor output frequency<sup>50,51</sup>. We report expression of PACAP receptor (*Adcyap1r1*) in 15 out of  
237 17 samples (6 Type-1 neurons, 8 Type-2 neurons and 1 Unknown) for a combined mean  
238 expression level of  $3.52 \pm 3.24 \log_2(\text{FPKM})$ , which would explain the effect of PACAP on both,  
239 rhythm and pattern (Fig. 4, Supplementary Table 3).

240 SST (and SST receptors) are expressed in core preBötC neurons, including – but not limited to –  
241 those derived from Dbx1-expressing precursors<sup>3,4,52</sup>. Several seminal studies *in vitro* and *in vivo*  
242 show that SST modulates inspiratory rhythm and pattern<sup>53</sup>. However, more recent studies  
243 specifically posit that SST-expressing (SST<sup>+</sup>) preBötC neurons are inspiratory pattern generators,  
244 i.e., output-related neurons<sup>6,10</sup>. We report *Sst* expression in 14 out of 17 Dbx1 neurons: 5 Type-  
245 1, 8 Type-2, and 1 Unknown for a combined mean expression level of  $10.11 \pm 11.65 \log_2(\text{FPKM})$   
246 (Fig. 4). Therefore, our data are incongruent with the theory that divides *rhythm* and *pattern*  
247 Dbx1 preBötC neurons on the basis of SST. Since we find that SST<sup>+</sup> Dbx1 neurons are well  
248 apportioned among putative rhythm- and pattern-generating subpopulations, Type-1 and Type-  
249 2, respectively, we posit that a substantial population of non-Dbx1 SST<sup>+</sup> neurons with  
250 exclusively pattern-generating functionality exists in the preBötC, which we did not sample.

## 251 Perspectives

252 Dbx1-derived preBötC neurons operate in unison to generate breathing movements. We  
253 distinguish *rhythm* and *pattern* functions in seeking to understand the neural origins of  
254 breathing but we should remember that there is just one behavior. Type-1 and Type-2 neurons  
255 are significantly different on the basis of only 123 genes out of the 31,420 genes, although it  
256 should be noted that our criteria of  $p_{\text{adj}} < 0.01$  and  $\text{L2FC} > 1.5$  are relatively stringent<sup>54–56</sup>. Thus,  
257 these putative rhythm- and pattern-generating populations have much more in common in  
258 terms of their transcriptomes, compared to that which differentiates them.

259 We acknowledge technical limitations could have limited our ability to resolve Type-1 vs. Type-  
260 2 transcriptome disparity. The minute amount of starting material (usually  $\leq 10$  pg RNA in the  
261 retrieved cytoplasm) from a single neuron necessitates substantial amplification to get  
262 sufficient cDNA for sequencing ( $> 150$  pg/ $\mu\text{L}$ ). Amplification leads to bias favoring some  
263 sequences and invariably drowning-out others<sup>57</sup>. Also, reverse transcription (RT) errors can  
264 lead to misreplication follow by a failure to map to the reference genome. These caveats  
265 produce false zeros for genes that are biologically expressed at non-zero levels<sup>54,58,59</sup>. We  
266 performed multiple quality checks (Supplementary Fig. 1B) for our sequences, used stringent  
267 criteria for selecting DE genes and scrambling to ensure the differential expression analysis was  
268 efficient in detecting DE genes. However, these checks cannot differentiate a technical zero  
269 from a biological zero. The upshot of these caveats is that our Patch-Seq analysis assuredly

270 missed some expressed genes and incorporates some false zeros. We further acknowledge that  
271 the disparities between Type-1 and Type-2 neurons may come about during translation and  
272 post-translational modifications, which impact phenotypic properties like inspiratory burst  
273 magnitude ( $I_{CAN}$ , i.e., Trpm4-dependent), delayed excitation ( $I_A$ ), and sag potentials ( $I_h$ ).

274 Nevertheless, these data provide the electrophysiology and transcriptomic data, including non-  
275 coding transcripts, for Dbx1 preBötC inspiratory neurons at the core of inspiratory rhythm and  
276 pattern generation. The transcriptomic data reported here can be utilized or meta-analyzed to  
277 design new experiments studying the neural control of breathing.

## 278 **Methods**

279 The Institutional Animal Care and Use Committee at William & Mary approved these protocols,  
280 which conform to policies set forth by the Office of Laboratory Animal Welfare (National  
281 Institutes of Health) and the National Research Council<sup>60</sup>.

### 282 **Mice**

283 We crossed knock-in mice generated by inserting an *IRES-CRE-pGK-Hygro* cassette in the 3' UTR  
284 of the *Developing brain homeobox 1* (i.e., *Dbx1*) gene, i.e., Dbx1<sup>Cre</sup> mice<sup>61</sup> (IMSR Cat# EM:01924,  
285 RRID:IMSR\_EM:01924) with mice featuring Cre-dependent expression of fluorescent Ca<sup>2+</sup>  
286 indicator GCaMP6f, dubbed Ai148 by the Allen Institute (RRID: IMSR\_JAX:030328, Daigle et al.  
287 2018). Ai148 mice had C57Bl/6J background; Dbx1<sup>Cre</sup> mice had a mixed C57Bl/6J;CD1 genetic  
288 background. We used their offspring, referred to as Dbx1;Ai148 mice (P0-2) for experiments.

289 The animals were housed in colony cages on a 12/12 h light/dark cycle with controlled humidity  
290 and temperature at 23 °C and fed *ad libitum* on a standard commercial mouse diet (Teklad  
291 Global Diets, Envigo) with free access to water.

### 292 ***In vitro* slice preparations**

293 The workbench was cleaned with RNase ZAP (Thermo Fisher, Waltham, MA) before beginning  
294 each experiment. All the beakers and tools were either autoclaved or cleaned first with RNase  
295 ZAP and then with nuclease-free water (NFW).

296 Dbx1;Ai148 pups were anesthetized by hypothermia, consistent with the American Veterinary  
297 Medical Association (AVMA) guidelines for euthanasia<sup>63</sup>. The neuraxis, from the pons to lower  
298 cervical spinal cord, was removed within ~2 min and submerged in ice-cold artificial  
299 cerebrospinal fluid (aCSF) containing (in mM): 124 NaCl, 3 KCl, 1.5 CaCl<sub>2</sub>, 1 MgSO<sub>4</sub>, 25 NaHCO<sub>3</sub>,  
300 0.5 NaH<sub>2</sub>PO<sub>4</sub>, and 30 dextrose. The aCSF was prepared in an RNase-free environment and then  
301 aerated continually with 95% O<sub>2</sub> and 5% CO<sub>2</sub> during the experiment. We trimmed the neuraxis  
302 and glued the dorsal surface of the brainstem onto an agar block (exposing the ventral side).  
303 The block and brainstem were affixed rostral side up within a vibratome (Campden Instruments  
304 7000 smz-2, Leicester, UK) while perfusing with aerated ice-cold aCSF. We cut a single  
305 transverse slice 450-500 μm thick with preBötC on its rostral surface. We started a 3-hr  
306 countdown clock as soon as the mouse was anesthetized and discarded the slice at the end of  
307 the interval to avoid sample degradation and contamination.



## 308 **Whole-cell patch-clamp recording and cytoplasmic sample collection**

309 We perfused slices with aCSF (28 °C) at 2-4 ml/min in a recording chamber on a fixed-stage  
310 upright microscope. The external K<sup>+</sup> concentration ( $[K^+]_{ext}$ ) of the aCSF was raised from 3 to 9  
311 mM to facilitate robust respiratory rhythm and XII motor output. We recorded XII motor output  
312 using suction electrodes fabricated from autoclaved borosilicate glass pipettes (OD: 1.2 mm, ID:  
313 0.68 mm) fire polished to a diameter of ~100 μm. XII motor output was amplified by 2,000,  
314 band-pass filtered at 0.3-1 kHz, and RMS smoothed for display.

315 Inspiratory Dbx1 preBötC neurons were selected visually based on rhythmic fluorescence  
316 emitted by GCaMP6f. Patch pipettes were fabricated from autoclaved borosilicate glass (OD:  
317 1.5 mm, ID: 0.86 mm) using a 4-stage program on a Flaming-Brown P-97 micropipette puller  
318 (Sutter Instruments, Novato, CA). Patch pipettes with tip resistance of 3-5 MΩ were filled with  
319 an internal solution, mixed in an RNase-free environment, containing (in mM): 123 K-gluconate,  
320 12 KCl, 10 HEPES, 0.2 EGTA, 4 Mg-ATP, 0.3 Na-GTP, 10 Na<sub>2</sub>-phosphocreatine, and 13 Glycogen  
321 (osmolarity adjusted to 270-290 mOsm and pH 7.25). We added 0.8% Recombinant  
322 Ribonuclease Inhibitor (RRI) to the internal solution immediately before each experiment to  
323 preserve RNA. We used robotic micromanipulators (Sensapex, Helsinki, Finland) to guide our  
324 patch pipettes toward inspiratory neurons under visual control and then performed whole-cell  
325 patch-clamp recordings using an EPC-10 patch-clamp amplifier (HEKA Instruments, Holliston,  
326 MA) with PATCHMASTER software (RRID:SCR\_000034).

327 Starting from a quiescent membrane potential between inspiratory bursts, we defined  
328 inspiratory drive latency as the elapsed time from first detection of summing synaptic  
329 potentials (EPSPs) until the onset of the inspiratory burst.

330 We tested for A-type K<sup>+</sup> current ( $I_A$ ) by applying suprathreshold depolarizing current step  
331 commands of 750-1000 ms duration from holding potentials of -70 mV (Fig. 1B) and -50 mV.  
332 The net applied current during the step command was equivalent regardless of holding  
333 potential. Neurons expressing  $I_A$  exhibited delayed excitation of 120-220 ms from a holding  
334 potential of -70 mV, but not from a holding potential of -50 mV<sup>13,14</sup>.

335 We tested for hyperpolarization-activated cationic current ( $I_h$ ) by applying hyperpolarizing  
336 current step commands of 750-1000 ms duration, which caused initial voltage excursions  
337 exceeding -30 mV from a holding potential of -50 mV (Fig. 1C). Neurons expressing  $I_h$  exhibited  
338 a time- and voltage-dependent depolarizing 'sag'<sup>13,14</sup>.

339 After, categorizing the Dbx1 preBötC neuron as Type-1 and Type-2 (Supplementary Fig. 1A<sub>a</sub>),  
340 cytoplasmic contents were extracted under voltage clamp (-60 mV holding potential) by  
341 applying negative pressure (0.7-1.5 psi). Successful extraction left the neurons visibly shrunken.  
342 Negative pressure was applied for a maximum of 10 mins or until the neuron was  
343 electrophysiologically unstable, indicated by holding currents exceeding -600 pA, whichever  
344 happened first. The patch pipettes were retracted promptly, and the cytoplasmic contents were  
345 ejected by breaking the pipette tip at the bottom of the RNase-free PCR tube containing 4 μL of  
346 stock solution (stock solution = NFW with 2% RRI) while applying positive pressure  
347 (Supplementary Fig. 1A<sub>b</sub>). Great care was taken to avoid any bubbles while applying positive

348 pressure. Samples were briefly spun in a mini centrifuge, then snap-frozen in liquid nitrogen  
349 and stored at -80°C until further processing.

350 We monitored for potential contamination by collecting negative control samples during each  
351 experiment. Patch pipettes were filled with internal solution and then inserted into the tissue  
352 without targeting any neuron for recording; their contents were processed identically.

### 353 **cDNA synthesis, library preparation and sequencing**

354 RNA from the recovered cytoplasm of patch-clamped neurons was converted to  
355 complementary DNA (cDNA) according to the SMART-Seq HT protocol (Takara Bio USA,  
356 Mountain View, CA), which incorporates the template-switching activity of the reverse  
357 transcriptase to select for full-length cDNAs and to add PCR adapters to both ends of the first-  
358 strand DNA (SMART = Switching Mechanism at 5' end of RNA Template). Samples were  
359 denatured at 72 °C for 3 min. poly(A)+ RNA was reverse transcribed using a tailed oligo(dT)  
360 primer. First strand cDNA synthesis and double-stranded cDNA amplification were performed in  
361 a thermocycler using the following program: 42 °C for 90 min; 95 °C for 1 min; 18 cycles of 98 °C  
362 for 10 s, 65 °C for 30 s, 68 °C for 3 min; and finally, 72 °C for 10 min. PCR-amplified cDNA was  
363 purified by immobilization on Agencourt AMPure XP beads (Beckman Coulter, Brea, CA), and  
364 then washed with 80% ethanol and eluted with elution buffer. Sequencing libraries were  
365 prepared from the amplified cDNA using SMART-Seq PLUS kits (Takara Bio USA, Mountain View,  
366 CA). Unique dual indexes were used on the amplified libraries to identify samples. We verified  
367 average cDNA size, abundance, and quality control of the final library using a Bioanalyzer High  
368 Sensitivity kit (Agilent, Santa Clara, CA) and Qubit dsDNA High-sensitivity Assay Kit (Molecular  
369 Probes, Eugene, OR) (Supplementary Fig. 1A<sub>c</sub>). cDNA samples containing less than 150 pg/μl  
370 cDNA were not sequenced. The cDNA sequencing libraries passing quality control were  
371 sequenced using an Illumina HiSeq X Sequencing system (Supplementary Fig. 1A<sub>d</sub>) with paired-  
372 end (150 bp) reads (Admera Health Biopharma Services, South Plainfield, NJ). A total of 18  
373 samples were sequenced. Investigators were blinded to cell type during library construction  
374 and sequencing.

### 375 **Quality control, pre-processing, and alignment to reference genome**

376 Nucleotide sequences along with their corresponding quality scores were returned as FASTQ  
377 files. We received an average of 18,724,864 (n = 18 samples) paired-end reads per sample. The  
378 quality of reads was verified using FastQC v0.11.8 (Supplementary Fig. 1B<sub>a</sub>). One sample  
379 returning 688 reads was discarded.

380 The mouse reference genome, mm10 from [Ensembl](#), was used to create the genome directory  
381 for aligning the reads in STAR using the following commands:

1. `wget ftp://ftp.ensembl.org/pub/release-102/fasta/mus\_musculus/dna/Mus\_musculus.GRCm38.dna.primary\_assembly.fa.gz`
2. `wget ftp://ftp.ensembl.org/pub/release-102/gtf/mus\_musculus/Mus\_musculus.GRCm38.102.gtf.gz`
3. `gunzip Mus_musculus.GRCm38.dna.primary_assembly.fa.gz`
4. `gunzip Mus_musculus.GRCm38.102.gtf.gz`

```
5. STAR --runMode genomeGenerate --genomeDir {path to genome folder} --genomeFastaFiles
Mus_musculus.GRCm38.dna.primary_assembly.fa --sjdbGTFfile Mus_musculus.GRCm38.102.gtf --
sjdbOverhang 149 --genomeSAsparseD 2
```

382 The raw reads were aligned to the mm10 reference genome by the splice-aware STAR software  
383 v2.7.7a, which generates BAM alignment files (Supplementary Fig. 1B<sub>c</sub>), using the following  
384 command:

```
1. STAR --genomeDir mm10ReferenceGenome --readFilesIn inputFASTQFile1.fastq
inputFASTQFile2.fastq --outFileNamePrefix outputBAMFile --outSAMtype BAM SortedByCoordinate
--outReadsUnmapped Fastx
```

385 The alignment procedure (above) was done a total of 3 times for each sample to monitor the  
386 quality of the samples. The first alignment corresponds to raw reads. The second and third  
387 alignments are done after removing adapter and overrepresented sequences, respectively.

388 Adapters added during library construction: AGATCGGAAGAGCACACGTCTGAACTCCAGTCA  
389 (paired end 1) and AGATCGGAAGAGCGTCGTGTAGGGAAAGAGTGT (paired end 2) were trimmed  
390 (Supplementary Fig. 1B<sub>b</sub>) by bbduk v38.00 using the following command:

```
1. sh bbduk.sh in1=inputFASTQFile1.fastq in2=inputFASTQFile2.fastq out1=outputFASTQFile1.fastq
out2=outputFASTQFile2.fastq ktrim=r -Xmx27g mm=f k=33 hdist=1
literal=AGATCGGAAGAGCACACGTCTGAACTCCAGTCA,AGATCGGAAGAGCGTCGTGTAGGGAAAGAGT
GT tbo tpe
```

391 The SMART-Seq HT kit uses dT priming for first-strand cDNA synthesis, annealing to the poly A  
392 tails of mRNA. The sequencing reads contained poly T/A sequences that were identified by  
393 FASTQC and tagged as overrepresented sequences, and finally trimmed (Supplementary Fig.  
394 1B<sub>b</sub>) by cutAdapt v3.2 using the following command:

```
1. cutadapt -a overrepresentedSequence -A overrepresentedSequence' -o outputFASTQFile1.fastq -p
outputFASTQFile2.fastq inputFASTQFile1.fastq inputFASTQFile2.fastq -m 10 -j 4
```

395 The STAR v2.7.7a alignment software tallies the number of sequences that (i) align uniquely, (ii)  
396 align at multiple portions, or (iii) fail to align with mm10. We present these alignment statistics  
397 for each step (raw reads, adapter-trimmed reads, and adapter-trimmed reads following  
398 removal of overrepresented sequences, i.e., *processed reads*) in Supplementary Table 1. Only  
399 the final processed reads were used for downstream analysis.

400 We employed Qualimap v.2.2.2 to perform a final quality check of the BAM alignment files  
401 using this command:

```
1. qualimap rnaseq -bam inputFile.bam -gtf Mus_musculus.GRCm38.102.gtf outdir outputFileDir --
paired --java-mem-size=4G
```

402 Intergenic reads exceeding 30% indicate DNA contamination. Our samples showed an average  
403 of 5.37% ± 2.33% intergenic reads (n = 17) so we conclude that our samples were not

404 contaminated and thus could be used for downstream analyses. The quality control metrics of  
405 the processed reads, computed by Qualimap, are shown in Supplementary Table 1.

406 Uniquely aligned reads were converted to fragment counts (Supplementary Fig. 1B<sub>d</sub>) using  
407 featureCounts from the Rsubread package v2.4.2. The data pre-processing was performed using  
408 computing facilities at William & Mary (<https://www.wm.edu/it/rc>).

#### 409 **Data analysis**

410 We wrote custom R scripts (R v4.0.3, RRID:SCR\_001905) that quantify gene expression as  
411 fragment counts per kilobase of exon per million mapped reads (FPKM; Supplementary Fig.  
412 1B<sub>e</sub>). This quantification method is ideally suited for paired-end reads and normalizes for gene  
413 length and quantity of mapped reads. We also used R scripts to compute the mean and  
414 standard deviation (SD) of FPKM values. The log<sub>2</sub> transformed value of FPKM, mean FPKM, or  
415 mean + SD FPKM were used for visualization.

416 Genes that are part of mm10 but had zero fragment counts in all 17 samples were omitted from  
417 all further analyses and consideration (23,824 genes). We performed differential expression  
418 analyses on the remaining non-zero genes (31,543 genes) using DESeq2 v1.30.1 software.  
419 DESeq2 uses fragment count (not FPKM) for each gene to calculate its geometric mean (non-  
420 zero counts only) across all the samples (Supplementary Fig. 1B<sub>f</sub>). Next, it normalizes each count  
421 by dividing the fragment count of the gene by its geometric mean. The fold change (L2FC)  
422 between Type-1 and Type-2 Dbx1 neurons is calculated using logarithm (base 2) of the  
423 normalized counts. Any gene where the L2FC exceeds 1.5 and adjusted p-value ( $p_{adj}$ ) is less than  
424 0.01 was deemed differentially expressed (DE).

425 Custom MATLAB scripts (RRID:SCR\_001622) implemented unsupervised principal component  
426 analysis (PCA) for dimensionality reduction and clustering of the log<sub>2</sub>(FPKM) expression profiles  
427 of 123 DE genes and 16 samples. Although the PCA was performed without regard for sample  
428 category, clustering of the Type-1 and Type-2 samples is evident using the first two principal  
429 component scores that represent 32% of the variation in the data (Fig. 2B, axes labelled PC1  
430 and PC2). A boundary line calculated using linear discriminant analysis (LDA) shows that an  
431 accurate Type-1 vs. Type-2 classification may be performed using the first two principal  
432 component scores.

433 As a control, we permuted the labels identifying the 16 samples as Type-1 vs. Type-2 and  
434 repeated our analyses of the log<sub>2</sub>(FPKM) expression profiles. In each of 10 scrambled data sets,  
435 50% of the samples were correctly labelled and 50% were “imposters” with false identities. In  
436 each case, we performed DESeq2 analysis to obtain a list of “DE genes” and performed PCA on  
437 this subset of genes. Supplementary Fig. 2A shows a representative LDA using PC1 and PC2 for  
438 genes differentially expressed between two groups of neurons with scrambled Type-1 and -2  
439 identities. The classification error in this case is 0.18, because 3 of the 16 neurons are  
440 misclassified (3 apparent Type-2 neurons, one of which is a Type-2 imposter, are on or below  
441 the boundary line). Overall, the performance of classifiers obtained by LDA of such “DE genes”  
442 was severely degraded compared to the unscrambled case, especially when the LDA was  
443 restricted to the first several principal component scores (Supplementary Fig. 2). This result  
444 adds confidence to our list of DE genes for Type-1 versus Type-2 neurons.

## 445 Data & code availability

446 The raw data of nucleotide sequences along with their corresponding quality scores (FASTQ  
447 format), raw fragment counts of the processed data (text file) and the FPKM values of the  
448 processed data (text file) are publicly available in the NCBI GEO database (Accession code:  
449 [GSE175642](https://www.ncbi.nlm.nih.gov/geo/query/acc.cgi?acc=GSE175642)). The custom R scripts written to process the raw fragments counts are freely  
450 available (<https://github.com/prajkta9/bioinformatics-scRNA-seq>).

## 451 References

- 452 1. Smith, J. C., Ellenberger, H. H., Ballanyi, K., Richter, D. W. & Feldman, J. L. Pre-Bötzinger  
453 Complex: A Brainstem Region That May Generate Respiratory Rhythm in Mammals. *Science*  
454 **254**, 726–729 (1991).
- 455 2. Del Negro, C. A., Funk, G. D. & Feldman, J. L. Breathing matters. *Nat. Rev. Neurosci.* **19**, 351–  
456 367 (2018).
- 457 3. Gray, P. A. *et al.* Developmental Origin of preBötzinger Complex Respiratory Neurons. *J.*  
458 *Neurosci.* **30**, 14883–14895 (2010).
- 459 4. Bouvier, J. *et al.* Hindbrain interneurons and axon guidance signaling critical for breathing.  
460 *Nat. Neurosci.* **13**, 1066 (2010).
- 461 5. Baertsch, N. A., Baertsch, H. C. & Ramirez, J. M. The interdependence of excitation and  
462 inhibition for the control of dynamic breathing rhythms. *Nat. Commun.* **9**, 843 (2018).
- 463 6. Cui, Y. *et al.* Defining preBötzinger Complex Rhythm- and Pattern-Generating Neural  
464 Microcircuits In Vivo. *Neuron* **91**, 602–614 (2016).
- 465 7. Revill, A. L. *et al.* Dbx1 precursor cells are a source of inspiratory XII premotoneurons. *eLife*  
466 **4**, e12301 (2015).
- 467 8. Vann, N. C., Pham, F. D., Dorst, K. E. & Del Negro, C. A. Dbx1 Pre-Bötzinger Complex  
468 Interneurons Comprise the Core Inspiratory Oscillator for Breathing in Unanesthetized  
469 Adult Mice. *eNeuro* **5**, ENEURO.0130-18.2018 (2018).
- 470 9. Wang, X. *et al.* Laser ablation of Dbx1 neurons in the pre-Bötzinger complex stops  
471 inspiratory rhythm and impairs output in neonatal mice. *eLife* **3**, e03427 (2014).
- 472 10. Ashhad, S. & Feldman, J. L. Emergent elements of inspiratory rhythmogenesis: network  
473 synchronization and synchrony propagation. *Neuron* **106**, 482–497 (2020).
- 474 11. Kallurkar, P. S., Grover, C., Picardo, M. C. D. & Del Negro, C. A. Evaluating the Burstlet  
475 Theory of Inspiratory Rhythm and Pattern Generation. *eNeuro* **7**, (2020).
- 476 12. Kam, K., Worrell, J. W., Janczewski, W. A., Cui, Y. & Feldman, J. L. Distinct Inspiratory  
477 Rhythm and Pattern Generating Mechanisms in the preBötzinger Complex. *J. Neurosci.* **33**,  
478 9235 (2013).
- 479 13. Picardo, M. C. D., Weragalaarachchi, K. T., Akins, V. T. & Del Negro, C. A. Physiological and  
480 morphological properties of Dbx1-derived respiratory neurons in the pre-Bötzinger complex  
481 of neonatal mice. *J. Physiol.* **591**, 2687–2703 (2013).

- 482 14. Rekling, J. C., Champagnat, J. & Denavit-Saubie, M. Electroresponsive properties and  
483 membrane potential trajectories of three types of inspiratory neurons in the newborn  
484 mouse brain stem in vitro. *J. Neurophysiol.* **75**, 795–810 (1996).
- 485 15. Hayes, J. A., Mendenhall, J. L., Brush, B. R. & Negro, C. A. D. 4-Aminopyridine-sensitive  
486 outward currents in preBötzinger complex neurons influence respiratory rhythm generation  
487 in neonatal mice. *J. Physiol.* **586**, 1921–1936 (2008).
- 488 16. Thoby-Brisson, M., Telgkamp, P. & Ramirez, J.-M. The role of the hyperpolarization-  
489 activated current in modulating rhythmic activity in the isolated respiratory network of  
490 mice. *J. Neurosci.* **20**, 2994–3005 (2000).
- 491 17. Lipovsek, M. *et al.* Patch-seq: Past, Present, and Future. *J. Neurosci.* **41**, 937–946 (2021).
- 492 18. Zhao, X. *et al.* Serotonin type-1D receptor stimulation of A-type K<sup>+</sup> channel decreases  
493 membrane excitability through the protein kinase A- and B-Raf-dependent p38 MAPK  
494 pathways in mouse trigeminal ganglion neurons. *Cell. Signal.* **28**, 979–988 (2016).
- 495 19. Hoffman, D. A. & Johnston, D. Downregulation of Transient K<sup>+</sup> Channels in Dendrites of  
496 Hippocampal CA1 Pyramidal Neurons by Activation of PKA and PKC. *J. Neurosci.* **18**, 3521–  
497 3528 (1998).
- 498 20. Yuan, L.-L., Adams, J. P., Swank, M., Sweatt, J. D. & Johnston, D. Protein Kinase Modulation  
499 of Dendritic K<sup>+</sup> Channels in Hippocampus Involves a Mitogen-Activated Protein Kinase  
500 Pathway. *J. Neurosci.* **22**, 4860–4868 (2002).
- 501 21. Al-Zubaidy, Z. A., Erickson, R. L. & Greer, J. J. Serotonergic and noradrenergic effects on  
502 respiratory neural discharge in the medullary slice preparation of neonatal rats. *Pflüg. Arch.*  
503 **431**, 942–949 (1996).
- 504 22. Ptak, K. *et al.* Raphé Neurons Stimulate Respiratory Circuit Activity by Multiple Mechanisms  
505 via Endogenously Released Serotonin and Substance P. *J. Neurosci.* **29**, 3720–3737 (2009).
- 506 23. Schwarzacher, S. W., Pestean, A., Günther, S. & Ballanyi, K. Serotonergic modulation of  
507 respiratory motoneurons and interneurons in brainstem slices of perinatal rats.  
508 *Neuroscience* **115**, 1247–1259 (2002).
- 509 24. Covington, E. D., Wu, M. M. & Lewis, R. S. Essential Role for the CRAC Activation Domain in  
510 Store-dependent Oligomerization of STIM1. *Mol. Biol. Cell* **21**, 1897–1907 (2010).
- 511 25. Grabmayr, H., Romanin, C. & Fahrner, M. STIM Proteins: An Ever-Expanding Family. *Int. J.*  
512 *Mol. Sci.* **22**, 378 (2021).
- 513 26. Parekh, A. B. & Putney, J. W. Store-Operated Calcium Channels. *Physiol. Rev.* **85**, 757–810  
514 (2005).
- 515 27. Roos, J. *et al.* STIM1, an essential and conserved component of store-operated Ca<sup>2+</sup>-  
516 channel function. *J. Cell Biol.* **169**, 435–445 (2005).
- 517 28. Eylonstein, A. *et al.* Stimulation of Ca<sup>2+</sup>-channel Orai1/STIM1 by serum-and glucocorticoid-  
518 inducible kinase 1 (SGK1). *FASEB J.* **25**, 2012–2021 (2011).

- 519 29. Koizumi, H. *et al.* Transient Receptor Potential Channels TRPM4 and TRPC3 Critically  
520 Contribute to Respiratory Motor Pattern Formation but not Rhythmogenesis in Rodent  
521 Brainstem Circuits. *eneuro* **5**, ENEURO.0332-17.2018 (2018).
- 522 30. Pace, R. W., Mackay, D. D., Feldman, J. L. & Negro, C. A. D. Inspiratory bursts in the  
523 preBötzinger complex depend on a calcium-activated non-specific cation current linked to  
524 glutamate receptors in neonatal mice. *J. Physiol.* **582**, 113–125 (2007).
- 525 31. Picardo, M. C. D. *et al.* Trpm4 ion channels in pre-Bötzinger complex interneurons are  
526 essential for breathing motor pattern but not rhythm. *PLOS Biol.* **17**, e2006094 (2019).
- 527 32. Li, P. & Yackle, K. Sighing. *Curr. Biol.* **27**, R88–R89 (2017).
- 528 33. Ramirez, J. M. *et al.* Purinergic signaling mediates neuroglial interactions to generate sighs.  
529 (2021) doi:10.21203/rs.3.rs-294601/v1.
- 530 34. Funk, G. D., Smith, J. C. & Feldman, J. L. Generation and transmission of respiratory  
531 oscillations in medullary slices: role of excitatory amino acids. *J. Neurophysiol.* **70**, 1497–  
532 1515 (1993).
- 533 35. Wallén-Mackenzie, Å. *et al.* Vesicular Glutamate Transporter 2 Is Required for Central  
534 Respiratory Rhythm Generation But Not for Locomotor Central Pattern Generation. *J.*  
535 *Neurosci.* **26**, 12294 (2006).
- 536 36. Rekling, J. C., Shao, X. M. & Feldman, J. L. Electrical Coupling and Excitatory Synaptic  
537 Transmission between Rhythmogenic Respiratory Neurons in the PreBötzinger Complex. *J.*  
538 *Neurosci.* **20**, RC113 (2000).
- 539 37. Slepukhin, V. M., Ashhad, S., Feldman, J. L. & Levine, A. J. Microcircuit synchronization and  
540 heavy tailed synaptic weight distribution in preBötzinger Complex contribute to generation  
541 of breathing rhythm. *bioRxiv* 2020.12.22.424079 (2020) doi:10.1101/2020.12.22.424079.
- 542 38. Cregg, J. M., Chu, K. A., Dick, T. E., Landmesser, L. T. & Silver, J. Phasic inhibition as a  
543 mechanism for generation of rapid respiratory rhythms. *Proc. Natl. Acad. Sci.* **114**, 12815  
544 (2017).
- 545 39. Janczewski, W. A., Tashima, A., Hsu, P., Cui, Y. & Feldman, J. L. Role of Inhibition in  
546 Respiratory Pattern Generation. *J. Neurosci.* **33**, 5454 (2013).
- 547 40. Marchenko, V. *et al.* Perturbations of Respiratory Rhythm and Pattern by Disrupting  
548 Synaptic Inhibition within Pre-Bötzinger and Bötzing Complexes. *eneuro* ENEURO.0011-  
549 16.2016 (2016) doi:10.1523/ENEURO.0011-16.2016.
- 550 41. Sherman, D., Worrell, J. W., Cui, Y. & Feldman, J. L. Optogenetic perturbation of  
551 preBötzinger complex inhibitory neurons modulates respiratory pattern. *Nat. Neurosci.* **18**,  
552 408 (2015).
- 553 42. Stifani, N. *et al.* Suppression of interneuron programs and maintenance of selected spinal  
554 motor neuron fates by the transcription factor AML1/Runx1. *Proc. Natl. Acad. Sci.* **105**,  
555 6451–6456 (2008).

- 556 43. Nadal, M. S. *et al.* The CD26-Related Dipeptidyl Aminopeptidase-like Protein DPPX Is a  
557 Critical Component of Neuronal A-Type K<sup>+</sup> Channels. *Neuron* **37**, 449–461 (2003).
- 558 44. Zagha, E. *et al.* DPP10 modulates Kv4-mediated A-type potassium channels. *J. Biol. Chem.*  
559 **280**, 18853–18861 (2005).
- 560 45. An, W. F. *et al.* Modulation of A-type potassium channels by a family of calcium sensors.  
561 *Nature* **403**, 553–556 (2000).
- 562 46. Wang, K. Modulation by clamping: Kv4 and KChIP interactions. *Neurochem. Res.* **33**, 1964–  
563 1969 (2008).
- 564 47. Bachmutsky, I., Wei, X. P., Kish, E. & Yackle, K. Opioids depress breathing through two small  
565 brainstem sites. *eLife* **9**, e52694 (2020).
- 566 48. Gray, P. A., Rekling, J. C., Bocchiaro, C. M. & Feldman, J. L. Modulation of Respiratory  
567 Frequency by Peptidergic Input to Rhythmogenic Neurons in the PreBötzinger Complex.  
568 *Science* **286**, 1566 (1999).
- 569 49. Li, P. *et al.* The peptidergic control circuit for sighing. *Nature* **530**, 293–297 (2016).
- 570 50. Shi, Y. *et al.* A brainstem peptide system activated at birth protects postnatal breathing.  
571 *Nature* **589**, 426–430 (2021).
- 572 51. Peña, F. PACAP Modulates the Respiratory Rhythm Generated in the Brainstem Slice  
573 Preparation. in *New Frontiers in Respiratory Control* (eds. Homma, I., Onimaru, H. &  
574 Fukuchi, Y.) 119–122 (Springer, 2010). doi:10.1007/978-1-4419-5692-7\_24.
- 575 52. Stornetta, R. L. *et al.* A group of glutamatergic interneurons expressing high levels of both  
576 neurokinin-1 receptors and somatostatin identifies the region of the pre-Bötzinger complex.  
577 *J. Comp. Neurol.* **455**, 499–512 (2003).
- 578 53. Tan, W. *et al.* Silencing preBötzinger Complex somatostatin-expressing neurons induces  
579 persistent apnea in awake rat. *Nat. Neurosci.* **11**, 538–540 (2008).
- 580 54. Kharchenko, P. V., Silberstein, L. & Scadden, D. T. Bayesian approach to single-cell  
581 differential expression analysis. *Nat. Methods* **11**, 740–742 (2014).
- 582 55. Love, M., Huber, W. & Andrews, S. Moderated estimation of fold change and dispersion for  
583 RNA-seq data with DESeq2 | Genome Biology | Full Text.  
584 <https://genomebiology.biomedcentral.com/articles/10.1186/s13059-014-0550-8> (2014).
- 585 56. Luecken, M. D. & Theis, F. J. Current best practices in single-cell RNA-seq analysis: a tutorial.  
586 *Mol. Syst. Biol.* **15**, e8746 (2019).
- 587 57. Kobschull, J. M. & Zador, A. M. Sources of PCR-induced distortions in high-throughput  
588 sequencing data sets. *Nucleic Acids Res.* **43**, e143 (2015).
- 589 58. Brennecke, P. *et al.* Accounting for technical noise in single-cell RNA-seq experiments. *Nat.*  
590 *Methods* **10**, 1093–1095 (2013).
- 591 59. Van den Berge, K. *et al.* Observation weights unlock bulk RNA-seq tools for zero inflation  
592 and single-cell applications. *Genome Biol.* **19**, 24 (2018).



- 593 60. National Research Council. *Guide for the care and use of laboratory animals, eighth edition*.  
594 (National Academies Press, 2011).
- 595 61. Bielle, F. *et al.* Multiple origins of Cajal-Retzius cells at the borders of the developing  
596 pallium. *Nat. Neurosci.* **8**, 1002 (2005).
- 597 62. Daigle, T. L. *et al.* A suite of transgenic driver and reporter mouse lines with enhanced brain  
598 cell type targeting and functionality. *Cell* **174**, 465–480 (2018).
- 599 63. Underwood, W. & Anthony, R. AVMA guidelines for the euthanasia of animals: 2020  
600 edition. *Retrieved March 2013*, 2020–2021 (2020).
- 601

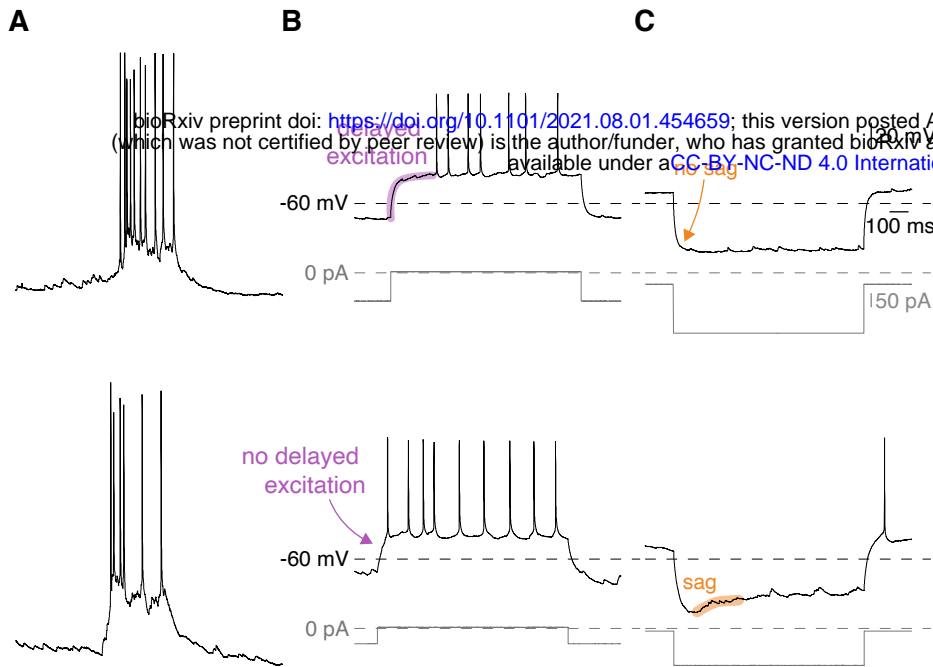

**Figure 1.** Physiological properties of Dbx1 preBötC inspiratory neurons. **A**, top and bottom traces show inspiratory burst characteristics in Type-1 and Type-2 Dbx1 preBötC neurons, respectively. **B**, Depolarizing current pulses (750-1000 ms) were applied from a membrane potential of -70 mV. Top and bottom traces show presence and absence of delayed excitation (purple) in Type-1 and Type-2 neurons, respectively. **C**, Hyperpolarizing current pulses (750-1000 ms) were injected from a membrane potential of -50 mV. Top and bottom traces show absence and presence of a sag potential (orange) in Type-1 and Type-2 neurons, respectively. Voltage, current, and time calibration bars apply to all traces.

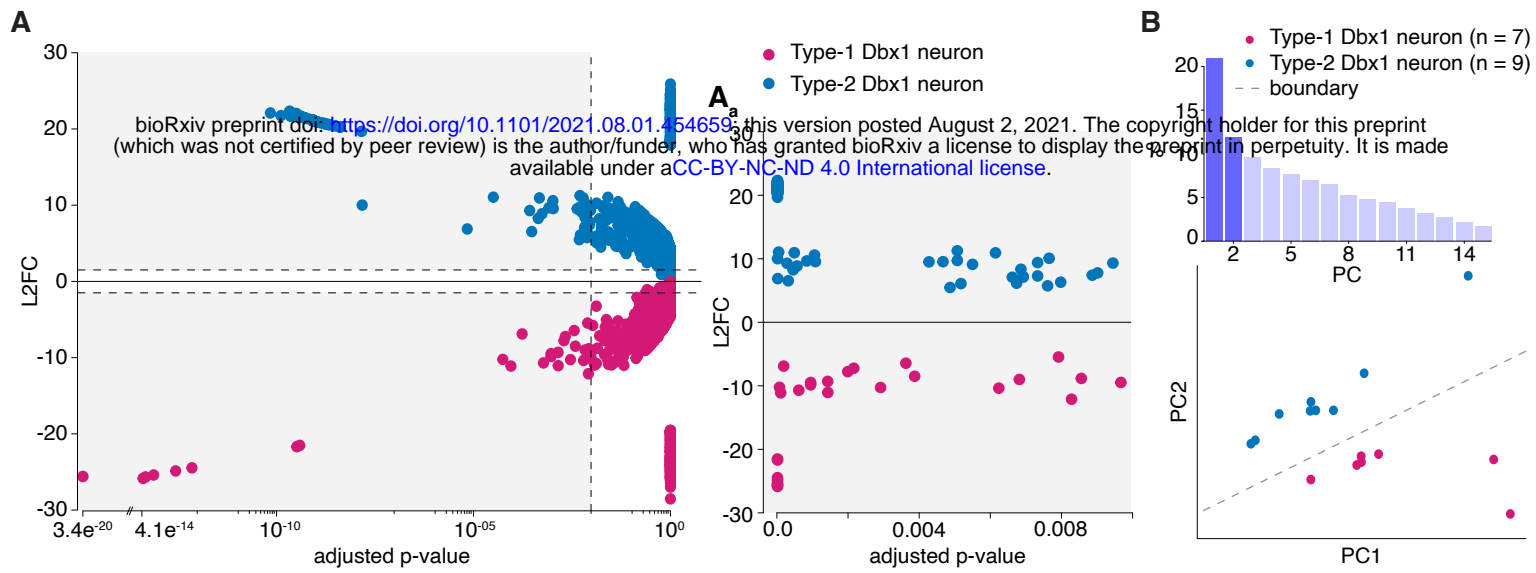

**Figure 2.** Transcriptomic differences in Type-1 and Type-2 neurons. **A**, L2FC versus adjusted p-values of 31,543 genes computed using DESeq2. Genes upregulated in Type-1 are in magenta and those upregulated in Type-2 are in blue-cyan. Gray shaded represents the region expanded in **A<sub>a</sub>**, which corresponds to  $L2FC > 1.5$  and  $padj < 0.01$ . **B**, Bar chart (top) shows PCs (x-axis) and variability (y-axis) in the expression of 123 DE genes. Scatter plot (bottom) shows clustering of Type-1 (magenta) and Type-2 (blue-cyan) neurons using the first two PCs (highlighted in dark violet at top). The gray dashed line shows the boundary between the clusters of Type-1 and Type-2 neurons drawn by LDA.

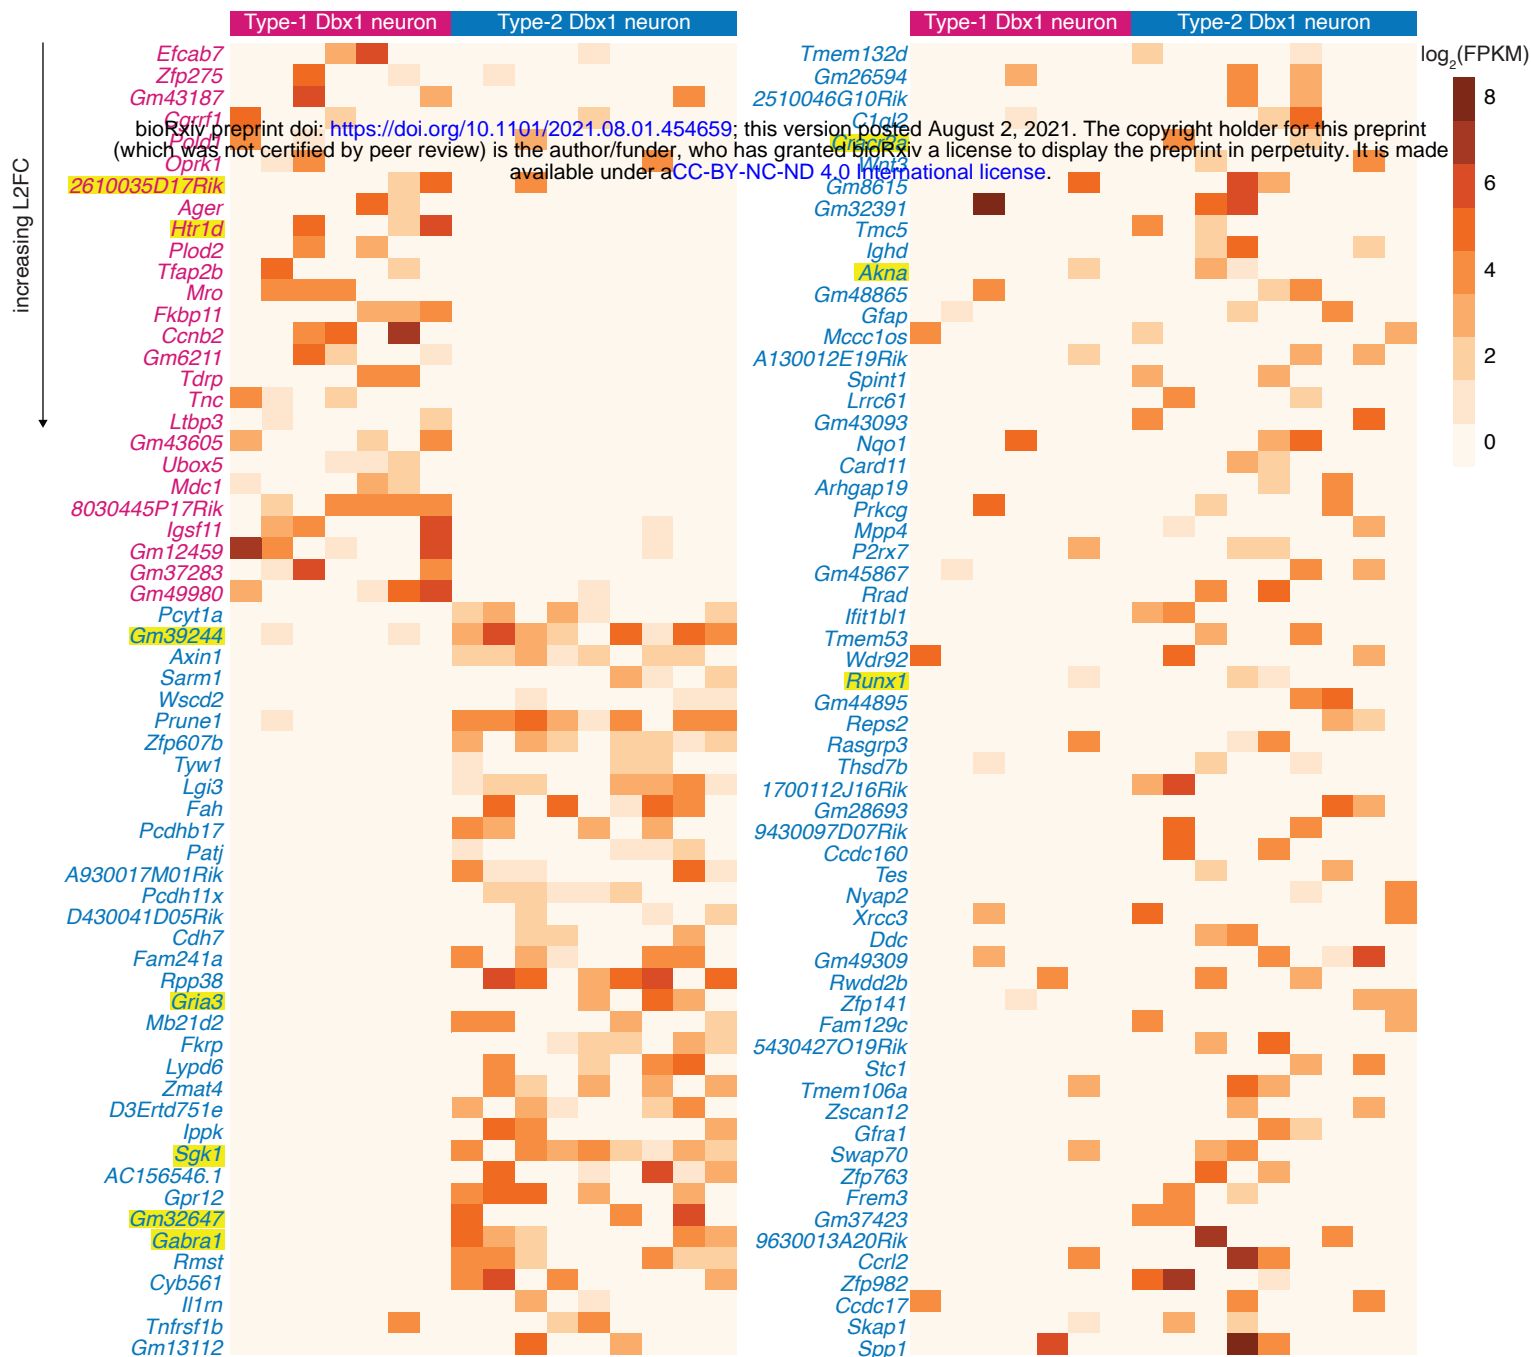

**Figure 3.** Log<sub>2</sub>(FPKM) of the DE genes in Type-1 and Type-2 neurons. Log<sub>2</sub>(FPKM) value is indicated by a pseudocolor scale. Individual neurons are listed in columns. Genes are listed in rows, arranged in the increasing order of L2FC values. The names of genes upregulated in Type-1 are in magenta and those upregulated in Type-2 neurons are in blue-cyan. Genes names highlighted in yellow are mentioned in the text.

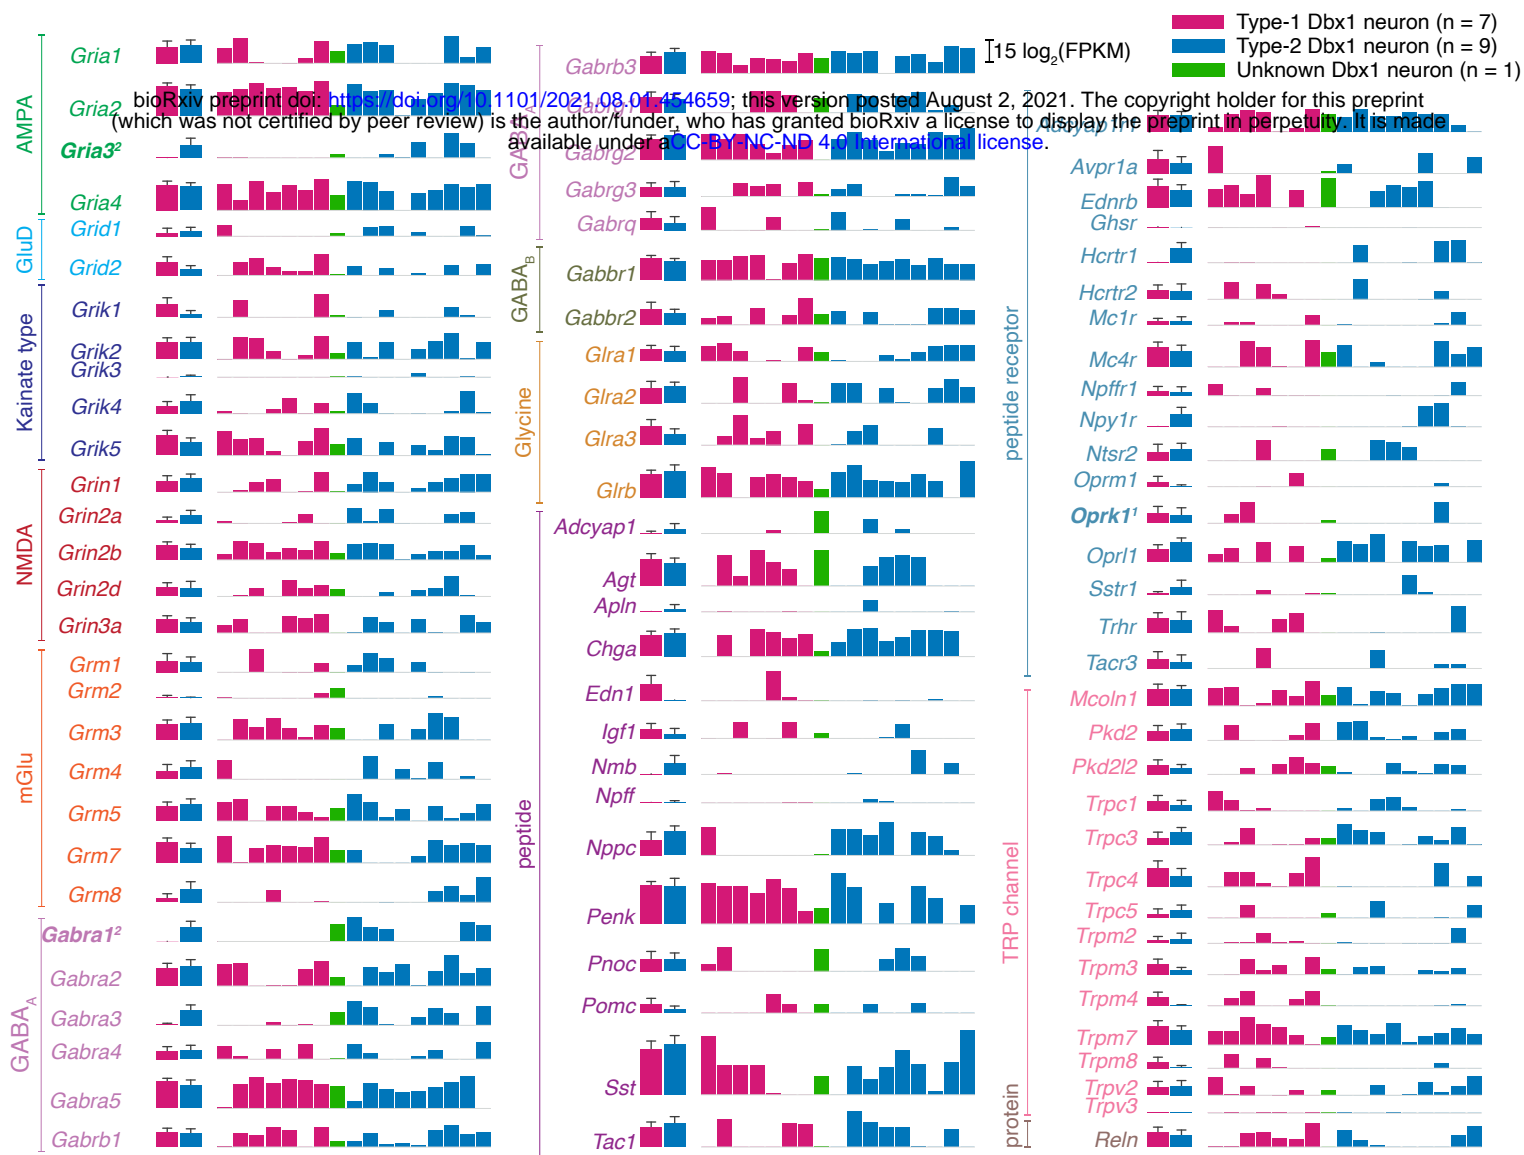

**Figure 4.** Quantitative gene expression for ionotropic and metabotropic synaptic receptors, neuropeptides, neuropeptide receptors, and Trp channels. The first two bars show group data for Type-1 (n = 7; magenta bar) and Type-2 (n = 9; blue-cyan bar). The height of the bar is log<sub>2</sub>(mean FPKM) value and the error bar with horizontal cap shows log<sub>2</sub>(mean + SD). The next set of 17 bars shows log<sub>2</sub>(FPKM) values for each neuron in the following order: 7 Type-1 neurons (magenta), 1 Unknown neuron (green), and 9 Type-2 neurons (blue-cyan). Gene names are color-coded according to the subfamily to which they belong. Gene names in bold indicate DE and contain a superscript 1 if upregulated Type-1 neurons and 2 if upregulated in Type-2 neurons.

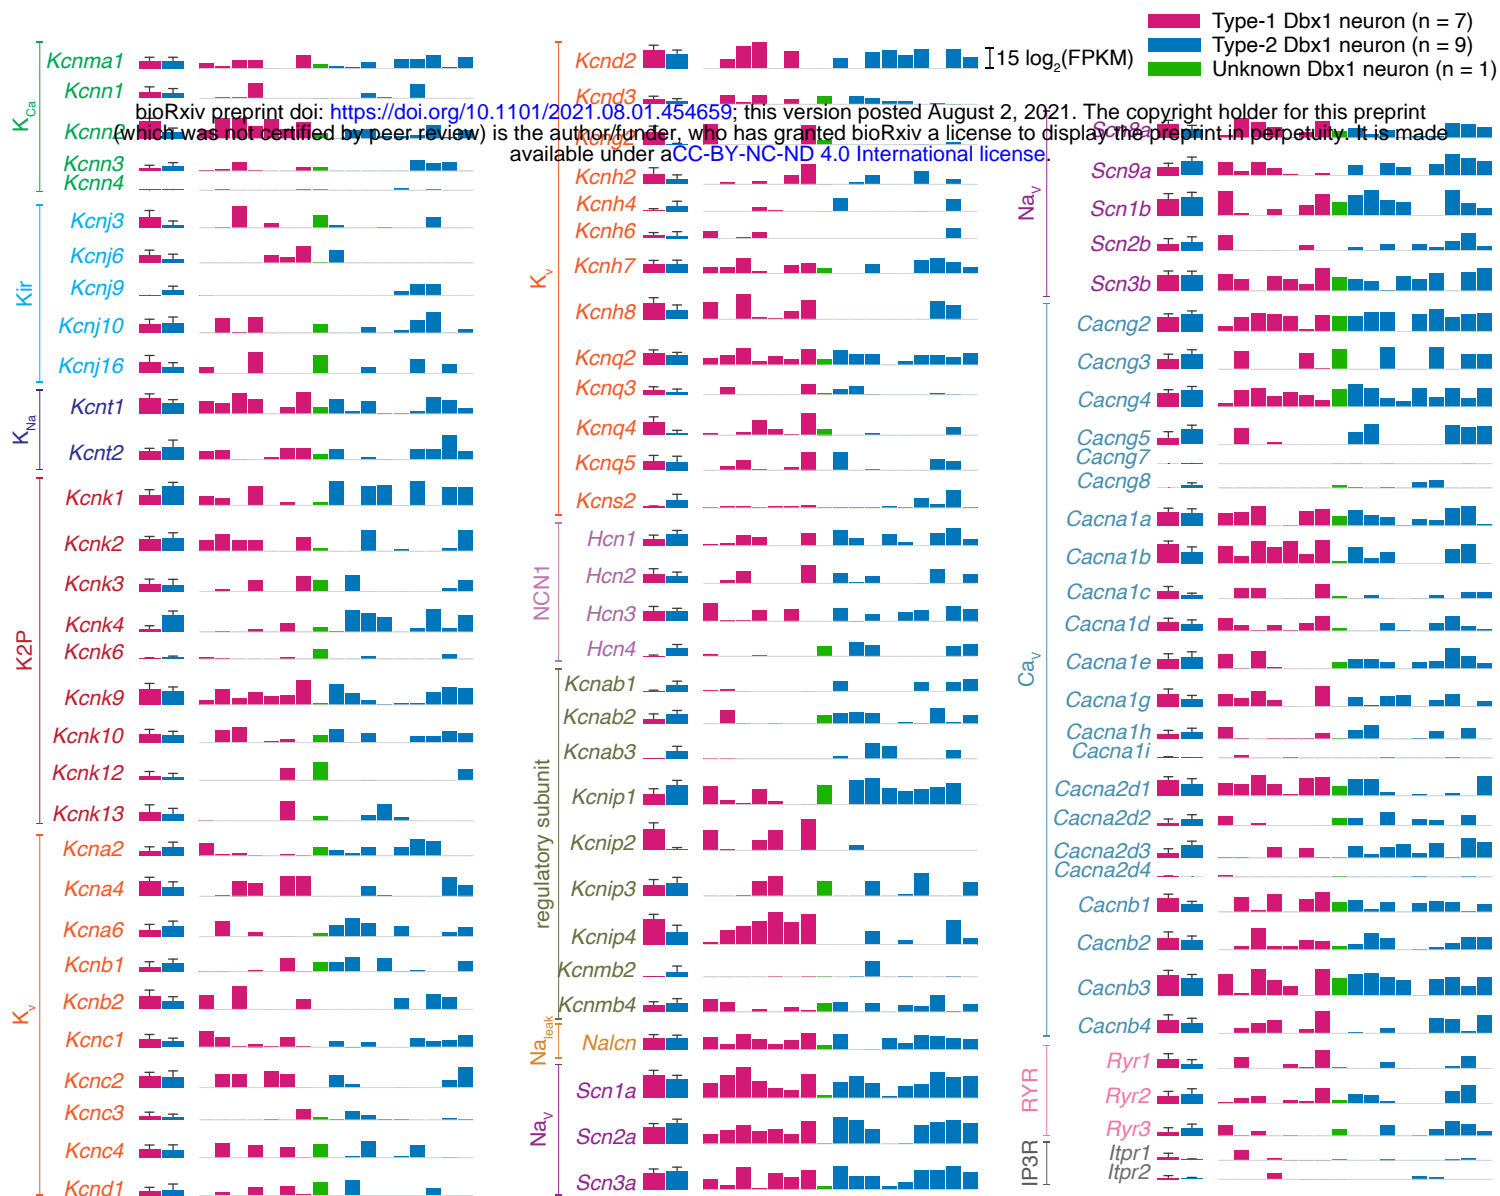

**Figure 5.** Quantitative gene expression for voltage-dependent ion channels, regulatory subunits, and intracellular receptors. The first two bars show group data for Type-1 (n = 7; magenta bar) and Type-2 (n = 9; blue-cyan bar). The height of the bar is log<sub>2</sub>(mean FPKM) value and the error bar with horizontal cap shows log<sub>2</sub>(mean + SD). The next of 17 bars shows log<sub>2</sub>(FPKM) values for each neuron in the following order: 7 Type-1 neurons (magenta), 1 Unknown neuron (green), and 9 Type-2 neurons (blue-cyan). Gene names are color-coded according to the subfamily to which they belong. None are DE.
